# Supplementary material
Source: PubMed Central journal article supplement (PMC2924825)
Supplement: mcq125_1.pdf [file mcq125_1.pdf]

## SUPPLEMENTARY DATA

TABLE S1. Information of 310 wild and landrace soybeans used in the study

| Individual | Species             | Location    | Province and/or Country |
|------------|---------------------|-------------|-------------------------|
| SCs35      | <i>Glycine soja</i> | Taiwan      | Taiwan, China           |
| SCs36      | <i>Glycine soja</i> | Taiwan      | Taiwan, China           |
| SCm38      | <i>Glycine max</i>  | Taiwan      | Taiwan, China           |
| SCm39      | <i>Glycine max</i>  | Taiwan      | Taiwan, China           |
| SCm40      | <i>Glycine max</i>  | Taiwan      | Taiwan, China           |
| SCm41      | <i>Glycine max</i>  | Taiwan      | Taiwan, China           |
| SCs44      | <i>Glycine soja</i> | Taiwan      | Taiwan, China           |
| SCs45      | <i>Glycine soja</i> | Taiwan      | Taiwan, China           |
| SCs46      | <i>Glycine soja</i> | Taiwan      | Taiwan, China           |
| SCs47      | <i>Glycine soja</i> | Taiwan      | Taiwan, China           |
| SCs62      | <i>Glycine soja</i> | Wuhan       | Hubei, China            |
| SCs63      | <i>Glycine soja</i> | Wufeng      | Hubei, China            |
| SCs64      | <i>Glycine soja</i> | Songzi      | Hubei, China            |
| SCs65      | <i>Glycine soja</i> | Lichuan     | Hubei, China            |
| SCs66      | <i>Glycine soja</i> | Yangxin     | Hubei, China            |
| SCs67      | <i>Glycine soja</i> | Tongshan    | Hubei, China            |
| SCs68      | <i>Glycine soja</i> | Wuhan       | Hubei, China            |
| SCs69      | <i>Glycine soja</i> | Luotian     | Hubei, China            |
| SCs70      | <i>Glycine soja</i> | Zhijiang    | Hubei, China            |
| SCs71      | <i>Glycine soja</i> | Shennongjia | Hubei, China            |
| SCs76      | <i>Glycine soja</i> | Wuhan       | Hubei, China            |
| SCs77      | <i>Glycine soja</i> | Wuhan       | Hubei, China            |
| NEs88      | <i>Glycine soja</i> | Tahe        | Heilongjiang, China     |
| NEs91      | <i>Glycine soja</i> | Sunwu       | Heilongjiang, China     |
| NEs92      | <i>Glycine soja</i> | Jiaying     | Heilongjiang, China     |
| NEs93      | <i>Glycine soja</i> | Nahe        | Heilongjiang, China     |
| NEs95      | <i>Glycine soja</i> | Qiqihaer    | Heilongjiang, China     |
| NEs96      | <i>Glycine soja</i> | Qiqihaer    | Heilongjiang, China     |
| NEs97      | <i>Glycine soja</i> | Jiamusi     | Heilongjiang, China     |
| NEs98      | <i>Glycine soja</i> | Daqing      | Heilongjiang, China     |
| NEs99      | <i>Glycine soja</i> | Haerbing    | Heilongjiang, China     |
| NEs100     | <i>Glycine soja</i> | Linkou      | Heilongjiang, China     |
| NEs101     | <i>Glycine soja</i> | Jixi        | Heilongjiang, China     |
| NEs102     | <i>Glycine soja</i> | Shangzhi    | Heilongjiang, China     |
| NEs103     | <i>Glycine soja</i> | Dongning    | Heilongjiang, China     |
| NEs104     | <i>Glycine soja</i> | Keyouqianqi | Jilin, China            |
| NEs105     | <i>Glycine soja</i> | Yushu       | Jilin, China            |
| NEs106     | <i>Glycine soja</i> | Dehui       | Jilin, China            |
| NEs107     | <i>Glycine soja</i> | Jiutai      | Jilin, China            |
| NEs108     | <i>Glycine soja</i> | Yongji      | Jilin, China            |

|        |                     |              |                  |
|--------|---------------------|--------------|------------------|
| NEs109 | <i>Glycine soja</i> | Huaide       | Jilin, China     |
| NEs110 | <i>Glycine soja</i> | Shuangyang   | Jilin, China     |
| NEs111 | <i>Glycine soja</i> | Wangqing     | Jilin, China     |
| NEs112 | <i>Glycine soja</i> | Tongliao     | Jilin, China     |
| NEs113 | <i>Glycine soja</i> | Yanji        | Jilin, China     |
| NEs114 | <i>Glycine soja</i> | Yanji        | Jilin, China     |
| NEs115 | <i>Glycine soja</i> | Yitong       | Jilin, China     |
| NEs116 | <i>Glycine soja</i> | Fusong       | Jilin, China     |
| NEs117 | <i>Glycine soja</i> | Tonghua      | Jilin, China     |
| NEs118 | <i>Glycine soja</i> | Changbai     | Jilin, China     |
| NEs119 | <i>Glycine soja</i> | Changtu      | Liaoning, China  |
| NEs120 | <i>Glycine soja</i> | Kaiyuan      | Liaoning, China  |
| NEs121 | <i>Glycine soja</i> | Kaiyuan      | Liaoning, China  |
| NEs123 | <i>Glycine soja</i> | Xinmin       | Liaoning, China  |
| NEs124 | <i>Glycine soja</i> | Taian        | Liaoning, China  |
| NEs125 | <i>Glycine soja</i> | Haicheng     | Liaoning, China  |
| NEs126 | <i>Glycine soja</i> | Gaixian      | Liaoning, China  |
| NEs127 | <i>Glycine soja</i> | Xinjin       | Liaoning, China  |
| NEs128 | <i>Glycine soja</i> | Dalian       | Liaoning, China  |
| NEs129 | <i>Glycine soja</i> | Changhai     | Liaoning, China  |
| NEs130 | <i>Glycine soja</i> | Xinbing      | Liaoning, China  |
| NEs131 | <i>Glycine soja</i> | Chaoyang     | Liaoning, China  |
| NEs132 | <i>Glycine soja</i> | Jianping     | Liaoning, China  |
| NEs133 | <i>Glycine soja</i> | Yixian       | Liaoning, China  |
| NCs134 | <i>Glycine soja</i> | Huhehaote    | Neimenggu, China |
| NCs135 | <i>Glycine soja</i> | Humengbuteha | Neimenggu, China |
| NEs136 | <i>Glycine soja</i> | Humengarong  | Neimenggu, China |
| NCs137 | <i>Glycine soja</i> | Beijing      | Beijing, China   |
| NEs138 | <i>Glycine soja</i> | Chengde      | Hebei, China     |
| NEs139 | <i>Glycine soja</i> | Xinglong     | Hebei, China     |
| NEs140 | <i>Glycine soja</i> | Changli      | Hebei, China     |
| NCs141 | <i>Glycine soja</i> | Wuqiao       | Hebei, China     |
| NCs142 | <i>Glycine soja</i> | Dingxian     | Hebei, China     |
| NCs143 | <i>Glycine soja</i> | Lincheng     | Hebei, China     |
| NCs144 | <i>Glycine soja</i> | Shilou       | Shanxi, China    |
| NCs145 | <i>Glycine soja</i> | Helanshan    | Ningxia, China   |
| NCs146 | <i>Glycine soja</i> | Zhongning    | Ningxia, China   |
| NCs147 | <i>Glycine soja</i> | Tianzheng    | Shanxi, China    |
| NCs148 | <i>Glycine soja</i> | Youyu        | Shanxi, China    |
| NCs149 | <i>Glycine soja</i> | Hequ         | Shanxi, China    |
| NCs150 | <i>Glycine soja</i> | Hunyuan      | Shanxi, China    |
| NCs151 | <i>Glycine soja</i> | Dingrang     | Shanxi, China    |
| NCs152 | <i>Glycine soja</i> | Jiaocheng    | Shanxi, China    |
| NCs153 | <i>Glycine soja</i> | Shilou       | Shanxi, China    |

|        |                     |           |                 |
|--------|---------------------|-----------|-----------------|
| NCs154 | <i>Glycine soja</i> | Taiyuan   | Shanxi, China   |
| NCs155 | <i>Glycine soja</i> | Yangcheng | Shanxi, China   |
| NCs156 | <i>Glycine soja</i> | Yongji    | Shanxi, China   |
| NCs157 | <i>Glycine soja</i> | Linfen    | Shanxi, China   |
| NCs158 | <i>Glycine soja</i> | Rongcheng | Shandong, China |
| NCs159 | <i>Glycine soja</i> | Yantai    | Shandong, China |
| NCs160 | <i>Glycine soja</i> | Laixi     | Shandong, China |
| NCs161 | <i>Glycine soja</i> | Wulian    | Shandong, China |
| NCs162 | <i>Glycine soja</i> | Lijin     | Shandong, China |
| NCs163 | <i>Glycine soja</i> | Huimin    | Shandong, China |
| NCs164 | <i>Glycine soja</i> | Laiwu     | Shandong, China |
| NCs165 | <i>Glycine soja</i> | Donga     | Shandong, China |
| NCs166 | <i>Glycine soja</i> | Juancheng | Shandong, China |
| NCs167 | <i>Glycine soja</i> | Jingyuan  | Gansu, China    |
| NCs168 | <i>Glycine soja</i> | Huachi    | Gansu, China    |
| NCs169 | <i>Glycine soja</i> | Zhenyuan  | Gansu, China    |
| NCs170 | <i>Glycine soja</i> | Zhangjia  | Gansu, China    |
| NCs171 | <i>Glycine soja</i> | Zhengning | Gansu, China    |
| NCs172 | <i>Glycine soja</i> | Tianshui  | Gansu, China    |
| NCs173 | <i>Glycine soja</i> | Huixian   | Gansu, China    |
| NCs174 | <i>Glycine soja</i> | Huaxian   | Henan, China    |
| NCs175 | <i>Glycine soja</i> | Shanxian  | Henan, China    |
| NCs176 | <i>Glycine soja</i> | Mengjin   | Henan, China    |
| NCs177 | <i>Glycine soja</i> | Xinzheng  | Henan, China    |
| NCs178 | <i>Glycine soja</i> | Baofeng   | Henan, China    |
| NCs179 | <i>Glycine soja</i> | Yancheng  | Henan, China    |
| NCs180 | <i>Glycine soja</i> | Miyang    | Henan, China    |
| NCs181 | <i>Glycine soja</i> | Zhengyang | Henan, China    |
| NCs182 | <i>Glycine soja</i> | Taikang   | Henan, China    |
| NCs183 | <i>Glycine soja</i> | Hengshan  | Shaanxi, China  |
| NCs184 | <i>Glycine soja</i> | Yulin     | Shaanxi, China  |
| NCs185 | <i>Glycine soja</i> | Wubao     | Shaanxi, China  |
| NCs186 | <i>Glycine soja</i> | Yanan     | Shaanxi, China  |
| NCs187 | <i>Glycine soja</i> | Huanglong | Shaanxi, China  |
| NCs188 | <i>Glycine soja</i> | Shiyi     | Shaanxi, China  |
| NCs189 | <i>Glycine soja</i> | Tongchuan | Shaanxi, China  |
| NCs190 | <i>Glycine soja</i> | Yaoxian   | Shaanxi, China  |
| NCs191 | <i>Glycine soja</i> | Dali      | Shaanxi, China  |
| NCs192 | <i>Glycine soja</i> | Tongguan  | Shaanxi, China  |
| NCs193 | <i>Glycine soja</i> | Tongguan  | Shaanxi, China  |
| NCs194 | <i>Glycine soja</i> | Zhenan    | Shaanxi, China  |
| NCs195 | <i>Glycine soja</i> | Shanyang  | Shaanxi, China  |
| NCs196 | <i>Glycine soja</i> | Xixiang   | Shaanxi, China  |
| NCs197 | <i>Glycine soja</i> | Fengxian  | Jiangsu, China  |

|        |                     |           |                 |
|--------|---------------------|-----------|-----------------|
| NCs198 | <i>Glycine soja</i> | Muyang    | Jiangsu, China  |
| NCs199 | <i>Glycine soja</i> | Guannan   | Jiangsu, China  |
| NCs200 | <i>Glycine soj</i>  | Guannan   | Jiangsu, China  |
| NCs201 | <i>Glycine soja</i> | Funing    | Jiangsu, China  |
| NCs202 | <i>Glycine soja</i> | Yancheng  | Jiangsu, China  |
| SCs203 | <i>Glycine soja</i> | Yangzhou  | Jiangsu, China  |
| SCs204 | <i>Glycine soja</i> | Jiangyin  | Jiangsu, China  |
| SCs205 | <i>Glycine soja</i> | Wuxian    | Jiangsu, China  |
| NCs206 | <i>Glycine soja</i> | Haoxian   | Anhui, China    |
| NCs207 | <i>Glycine soja</i> | Wuhe      | Anhui, China    |
| NCs208 | <i>Glycine soja</i> | Wuhe      | Anhui, China    |
| NCs209 | <i>Glycine soja</i> | Fengtai   | Anhui, China    |
| NCs210 | <i>Glycine soja</i> | Fengtai   | Anhui, China    |
| SCs212 | <i>Glycine soja</i> | Chuxian   | Anhui, China    |
| SCs213 | <i>Glycine soja</i> | Hefei     | Anhui, China    |
| SCs214 | <i>Glycine soja</i> | Chuxian   | Anhui, China    |
| SCs215 | <i>Glycine soja</i> | Chuxian   | Anhui, China    |
| SCs216 | <i>Glycine soja</i> | Taihu     | Anhui, China    |
| SCs217 | <i>Glycine soja</i> | Huangshan | Anhui, China    |
| SCs218 | <i>Glycine soja</i> | Qingchuan | Sichuan, China  |
| SCs219 | <i>Glycine soja</i> | Pingwu    | Sichuan, China  |
| SCs220 | <i>Glycine soja</i> | Nanjiang  | Sichuan, China  |
| SCs221 | <i>Glycine soja</i> | Wanyuan   | Sichuan, China  |
| SCs224 | <i>Glycine soja</i> | Sichuan   | Sichuan, China  |
| SCs225 | <i>Glycine soja</i> | Linan     | Zhejiang, China |
| SCs226 | <i>Glycine soja</i> | Chengxian | Zhejiang, China |
| SCs227 | <i>Glycine soja</i> | Tiantai   | Zhejiang, China |
| SCs228 | <i>Glycine soja</i> | Jinyun    | Zhejiang, China |
| SCs229 | <i>Glycine soja</i> | Xiaoshan  | Zhejiang, China |
| SCs230 | <i>Glycine soja</i> | Changxin  | Zhejiang, China |
| SCs231 | <i>Glycine soja</i> | Chayu     | Xizang, China   |
| SCs232 | <i>Glycine soja</i> | Chayu     | Xizang, China   |
| SCs233 | <i>Glycine soja</i> | Hukou     | Jiangxi, China  |
| SCs234 | <i>Glycine soja</i> | Jiujiang  | Jiangxi, China  |
| SCs235 | <i>Glycine soja</i> | Xiushui   | Jiangxi, China  |
| SCs236 | <i>Glycine soja</i> | Wuning    | Jiangxi, China  |
| SCs237 | <i>Glycine soja</i> | Nanchang  | Jiangxi, China  |
| SCs238 | <i>Glycine soja</i> | Dexing    | Jiangxi, China  |
| SCs239 | <i>Glycine soja</i> | Yushan    | Jiangxi, China  |
| SCs240 | <i>Glycine soja</i> | Yichun    | Jiangxi, China  |
| SCs241 | <i>Glycine soja</i> | Xingguo   | Jiangxi, China  |
| SCs242 | <i>Glycine soja</i> | Anyuan    | Jiangxi, China  |
| SCs244 | <i>Glycine soja</i> | Huarong   | Hunan, China    |
| SCs245 | <i>Glycine soja</i> | Yueyang   | Hunan, China    |

|        |                     |               |                  |
|--------|---------------------|---------------|------------------|
| SCs246 | <i>Glycine soja</i> | Shimen        | Hunan, China     |
| SCs247 | <i>Glycine soja</i> | Changde       | Hunan, China     |
| SCs248 | <i>Glycine soja</i> | Longshan      | Hunan, China     |
| SCs249 | <i>Glycine soja</i> | Liuyang       | Hunan, China     |
| SCs250 | <i>Glycine soja</i> | Hengyang      | Hunan, China     |
| SCs252 | <i>Glycine soja</i> | Chenzhou      | Hunan, China     |
| SCs253 | <i>Glycine soja</i> | Rongjiang     | Guizhou, China   |
| SCs254 | <i>Glycine soja</i> | Zhenyuan      | Guizhou, China   |
| SCs255 | <i>Glycine soja</i> | Majiang       | Guizhou, China   |
| SCs256 | <i>Glycine soja</i> | Tongren       | Guizhou, China   |
| SCs257 | <i>Glycine soja</i> | Yinjiang      | Guizhou, China   |
| SCs258 | <i>Glycine soja</i> | Yanhe         | Guizhou, China   |
| SCs259 | <i>Glycine soja</i> | Kaiyang       | Guizhou, China   |
| SCs260 | <i>Glycine soja</i> | Guangze       | Fujian, China    |
| SCs261 | <i>Glycine soja</i> | Pucheng       | Fujian, China    |
| SCs262 | <i>Glycine soja</i> | Dangtu        | Anhui, China     |
| SCs263 | <i>Glycine soja</i> | Xiapu         | Fujian, China    |
| SCs264 | <i>Glycine soja</i> | Jiangle       | Fujian, China    |
| SCs265 | <i>Glycine soja</i> | Jiangle       | Fujian, China    |
| SCs266 | <i>Glycine soja</i> | Jiangle       | Fujian, China    |
| SCs267 | <i>Glycine soja</i> | Longyan       | Fujian, China    |
| SCs268 | <i>Glycine soja</i> | Shaxian       | Fujian, China    |
| SCs269 | <i>Glycine soja</i> | Ninghua       | Fujian, China    |
| SCs270 | <i>Glycine soja</i> | Shanghang     | Fujian, China    |
| SCs271 | <i>Glycine soja</i> | Ninglang      | Yunnan, China    |
| SCs272 | <i>Glycine soja</i> | Yingde        | Guangdong, China |
| SCs273 | <i>Glycine soja</i> | Quanzhou      | Guangxi, China   |
| SCs274 | <i>Glycine soja</i> | Quanzhou      | Guangxi, China   |
| SCs275 | <i>Glycine soja</i> | Quanzhou      | Guangxi, China   |
| SCs276 | <i>Glycine soja</i> | Sanjiang      | Guangxi, China   |
| SCs277 | <i>Glycine soja</i> | Xingan        | Guangxi, China   |
| SCs278 | <i>Glycine soja</i> | Lipu          | Guangxi, China   |
| SCs279 | <i>Glycine soja</i> | Hexian        | Guangxi, China   |
| SCs280 | <i>Glycine soja</i> | Nandan        | Guangxi, China   |
| SCs281 | <i>Glycine soja</i> | Nandan        | Guangxi, China   |
| SCs282 | <i>Glycine soja</i> | Xiangzhou     | Guangxi, China   |
| NCs283 | <i>Glycine soja</i> | Yimengzhunqi  | Neimenggu, China |
| NCs285 | <i>Glycine soja</i> | Wuhai         | Neimenggu, China |
| NEs286 | <i>Glycine soja</i> | Humengarongqi | Neimenggu, China |
| NEs287 | <i>Glycine soja</i> | Xinganmeng    | Neimenggu, China |
| NCs288 | <i>Glycine soja</i> | Taiyuan       | Shanxi, China    |
| NCs289 | <i>Glycine soja</i> | Weifang       | Shandong, China  |
| SCs290 | <i>Glycine soja</i> | Rugao         | Jiangsu, China   |
| NCs291 | <i>Glycine soja</i> | Liangshan     | Shandong, China  |

|        |                     |           |                     |
|--------|---------------------|-----------|---------------------|
| SCs292 | <i>Glycine soja</i> | Fuzhou    | Fujian, China       |
| SCs293 | <i>Glycine soja</i> | Fuzhou    | Fujian, China       |
| NEs294 | <i>Glycine soja</i> | Daqing    | Heilongjiang, China |
| SCm295 | <i>Glycine max</i>  | Taiwan    | Taiwan, China       |
| SCm296 | <i>Glycine max</i>  | Taiwan    | Taiwan, China       |
| SCm297 | <i>Glycine max</i>  | Mingxi    | Fujian, China       |
| SCm298 | <i>Glycine max</i>  | Nanan     | Fujian, China       |
| SCm299 | <i>Glycine max</i>  | Lianping  | Guangdong, China    |
| SCm300 | <i>Glycine max</i>  | Boluo     | Guangdong, China    |
| SCm301 | <i>Glycine max</i>  | Guilin    | Guangxi, China      |
| SCm302 | <i>Glycine max</i>  | Zhongshan | Guangxi, China      |
| SCm303 | <i>Glycine max</i>  | Simao     | Yunnan, China       |
| SCm304 | <i>Glycine max</i>  | Dali      | Yunnan, China       |
| SCm305 | <i>Glycine max</i>  | Chunan    | Zhejiang, China     |
| SCm306 | <i>Glycine max</i>  | Jiande    | Zhejiang, China     |
| SCm307 | <i>Glycine max</i>  | Yongxiu   | Jiangxi, China      |
| SCm308 | <i>Glycine max</i>  | Fengcheng | Jiangxi, China      |
| SCm309 | <i>Glycine max</i>  | Hengshan  | Hunan, China        |
| SCm310 | <i>Glycine max</i>  | Hengyang  | Hunan, China        |
| SCm311 | <i>Glycine max</i>  | Xingren   | Guizhou, China      |
| SCm312 | <i>Glycine max</i>  | Anlong    | Guizhou, China      |
| SCm313 | <i>Glycine max</i>  | Congming  | Shanghai, China     |
| SCm314 | <i>Glycine max</i>  | Fengxian  | Shanghai, China     |
| SCm315 | <i>Glycine max</i>  | Huaiyin   | Jiangsu, China      |
| SCm316 | <i>Glycine max</i>  | Nanjing   | Jiangsu, China      |
| SCm317 | <i>Glycine max</i>  | Wuhe      | Anhui, China        |
| SCm318 | <i>Glycine max</i>  | Xiaoxian  | Anhui, China        |
| SCm319 | <i>Glycine max</i>  | Changyang | Hubei, China        |
| SCm320 | <i>Glycine max</i>  | Tongcheng | Hubei, China        |
| SCm321 | <i>Glycine max</i>  | Nanchong  | Sichuan, China      |
| SCm322 | <i>Glycine max</i>  | Fengdu    | Sichuan, China      |
| SCm323 | <i>Glycine max</i>  | Nielamu   | Xizang, China       |
| SCm324 | <i>Glycine max</i>  | Linzhi    | Xizang, China       |
| NCm325 | <i>Glycine max</i>  | Guangrao  | Shandong, China     |
| NCm326 | <i>Glycine max</i>  | Pingyuan  | Shandong, China     |
| NCm327 | <i>Glycine max</i>  | Lankao    | Henan, China        |
| NCm328 | <i>Glycine max</i>  | Dengfeng  | Henan, China        |
| NCm329 | <i>Glycine max</i>  | Chengde   | Hebei, China        |
| NCm330 | <i>Glycine max</i>  | Dacheng   | Hebei, China        |
| NCm331 | <i>Glycine max</i>  | Tongxian  | Beijing, China      |
| NCm332 | <i>Glycine max</i>  | Huairong  | Beijing, China      |
| NCm333 | <i>Glycine max</i>  | Daning    | Shanxi, China       |
| NCm334 | <i>Glycine max</i>  | Linchuan  | Shanxi, China       |
| NCm335 | <i>Glycine max</i>  | Suide     | Shaanxi, China      |

|        |                     |                |                     |
|--------|---------------------|----------------|---------------------|
| NCm336 | <i>Glycine max</i>  | Zichang        | Shaanxi, China      |
| NCm337 | <i>Glycine max</i>  | Zhongwei       | Ningxia, China      |
| NCm338 | <i>Glycine max</i>  | Zhongwei       | Ningxia, China      |
| NCm339 | <i>Glycine max</i>  | Huachi         | Gansu, China        |
| NCm340 | <i>Glycine max</i>  | Huating        | Gansu, China        |
| NCm341 | <i>Glycine max</i>  | Helingeer      | Neimenggu, China    |
| NCm342 | <i>Glycine max</i>  | Yikezhaomeng   | Neimenggu, China    |
| NCm343 | <i>Glycine max</i>  | Jinghe         | Xinjiang, China     |
| NCm344 | <i>Glycine max</i>  | Yanqi          | Xinjiang, China     |
| NEm345 | <i>Glycine max</i>  | Tieling        | Liaoning, China     |
| NEm346 | <i>Glycine max</i>  | Shenyang       | Liaoning, China     |
| NEm347 | <i>Glycine max</i>  | Changling      | Jilin, China        |
| NEm348 | <i>Glycine max</i>  | Jilin          | Jilin, China        |
| NEm349 | <i>Glycine max</i>  | Jiamusi        | Heilongjiang, China |
| NEm350 | <i>Glycine max</i>  | Tonghe         | Heilongjiang, China |
| SCs351 | <i>Glycine soja</i> | Wuhan          | Hubei China         |
| Ks352  | <i>Glycine soja</i> | Chungchong Puk | South Korea         |
| Js353  | <i>Glycine soja</i> | Okayama        | Japan               |
| Js354  | <i>Glycine soja</i> | Nagano         | Japan               |
| Rs355  | <i>Glycine soja</i> | Amur           | Russian Far East    |
| Rs356  | <i>Glycine soja</i> | Primorye       | Russian Far East    |
| Js357  | <i>Glycine soja</i> | Hokkaido       | Japan               |
| Rs358  | <i>Glycine soja</i> | Khabarovsk     | Russian Far East    |
| Ks359  | <i>Glycine soja</i> | Cheju          | South Korea         |
| Ks360  | <i>Glycine soja</i> | Cholla Puk     | South Korea         |
| Rs361  | <i>Glycine soja</i> | Khabarovsk     | Russian Far East    |
| Rs362  | <i>Glycine soja</i> | Khabarovsk     | Russian Far East    |
| Ks363  | <i>Glycine soja</i> | Cholla Puk     | South Korea         |
| Js364  | <i>Glycine soja</i> | Akita          | Japan               |
| Ks365  | <i>Glycine soja</i> | Kyonggi        | South Korea         |
| Js366  | <i>Glycine soja</i> | Miyazaki       | Japan               |
| Jm367  | <i>Glycine max</i>  | Yamaguchi      | Japan               |
| Km369  | <i>Glycine max</i>  | Cholla Puk     | South Korea         |
| Jm370  | <i>Glycine max</i>  | Akita          | Japan               |
| Km371  | <i>Glycine max</i>  | Seoul          | South Korea         |
| Km372  | <i>Glycine max</i>  | Cheju          | South Korea         |
| Jm373  | <i>Glycine max</i>  | Aichi          | Japan               |
| Jm374  | <i>Glycine max</i>  | Yamagata       | Japan               |
| Km375  | <i>Glycine max</i>  | Cholla Namdo   | South Korea         |
| Jm376  | <i>Glycine max</i>  | Shariin        | Japan               |
| Jm377  | <i>Glycine max</i>  | Kumamoto       | Japan               |
| Jm378  | <i>Glycine max</i>  | Nagano         | Japan               |
| Jm379  | <i>Glycine max</i>  | Kisaya         | Japan               |
| Jm380  | <i>Glycine max</i>  | Tokushima      | Japan               |

|       |                    |                  |             |
|-------|--------------------|------------------|-------------|
| Km381 | <i>Glycine max</i> | Chungchong Namdo | South Korea |
| Jm382 | <i>Glycine max</i> | Kumamoto         | Japan       |
| Jm383 | <i>Glycine max</i> | Kumamoto         | Japan       |
| Jm384 | <i>Glycine max</i> | Fukushima        | Japan       |
| Jm385 | <i>Glycine max</i> | Akita            | Japan       |
| Jm386 | <i>Glycine max</i> | Kagoshima        | Japan       |

---



TABLE S2. Genetic diversity of 56 loci

| Loci      | LG <sup>a</sup> | Position in LG(cM) | $N_A$ <sup>b</sup> | $F_{IS}$ <sup>c</sup> | $H_E$ <sup>d</sup> |
|-----------|-----------------|--------------------|--------------------|-----------------------|--------------------|
| Satt684   | A1              | 3.54               | 27                 | 0.955                 | 0.880              |
| Satt050   | A1              | 46.45              | 29                 | 0.969                 | 0.801              |
| SOYNOD26A | A1              | 66.8               | 29                 | 0.94                  | 0.899              |
| Satt174   | A1              | 88.58              | 21                 | 0.935                 | 0.858              |
| Satt390   | A2              | 9.14               | 29                 | 0.983                 | 0.907              |
| Satt208   | A2              | 128.44             | 25                 | 0.941                 | 0.881              |
| Satt429   | A2              | 162.03             | 47                 | 0.953                 | 0.956              |
| Satt509   | B1              | 32.51              | 28                 | 0.95                  | 0.896              |
| Sat_128   | B1              | 53.41              | 39                 | 0.941                 | 0.934              |
| Satt126   | B2              | 27.63              | 19                 | 0.927                 | 0.803              |
| Satt556   | B2              | 73.21              | 36                 | 0.92                  | 0.911              |
| Satt063   | B2              | 93.49              | 21                 | 0.897                 | 0.751              |
| Satt687   | B2              | 113.61             | 18                 | 0.96                  | 0.745              |
| SOYGPATR  | C1              | 10.34              | 13                 | 0.822                 | 0.643              |
| Satt194   | C1              | 26.35              | 28                 | 0.929                 | 0.904              |
| Sat_140   | C1              | 41.43              | 39                 | 0.96                  | 0.951              |
| AW277661  | C1              | 74.79              | 27                 | 0.953                 | 0.857              |
| Satt180   | C1              | 127.77             | 29                 | 0.88                  | 0.876              |
| Satt227   | C2              | 26.65              | 8                  | 0.914                 | 0.747              |
| Satt322   | C2              | 82.23              | 7                  | 0.935                 | 0.599              |
| Satt363   | C2              | 98.07              | 35                 | 0.954                 | 0.939              |
| Satt184   | D1a             | 17.52              | 33                 | 0.925                 | 0.86               |
| Satt179   | D1a             | 56.2               | 36                 | 0.93                  | 0.932              |
| Satt217   | D1b             | 9.8                | 38                 | 0.901                 | 0.925              |
| BE021153  | D1b             | 30.23              | 5                  | 0.968                 | 0.384              |
| Satt271   | D1b             | 137.06             | 7                  | 0.954                 | 0.504              |
| Satt002   | D2              | 47.73              | 33                 | 0.956                 | 0.912              |
| Satt669   | D2              | 67.71              | 35                 | 0.973                 | 0.905              |
| Satt082   | D2              | 87.25              | 10                 | 0.957                 | 0.735              |
| Satt186   | D2              | 105.45             | 31                 | 0.97                  | 0.918              |
| Satt212   | E               | 32.27              | 8                  | 0.944                 | 0.578              |
| Satt369   | E               | 56.27              | 23                 | 0.967                 | 0.884              |
| BE806387  | F               | 22.97              | 12                 | 0.98                  | 0.814              |
| Satt114   | F               | 63.69              | 18                 | 0.957                 | 0.833              |
| Satt362   | F               | 82.83              | 21                 | 0.96                  | 0.883              |
| Satt324   | G               | 33.26              | 19                 | 0.93                  | 0.885              |
| U08405    | H               | 7.26               | 29                 | 0.933                 | 0.828              |
| Satt142   | H               | 86.49              | 52                 | 0.963                 | 0.941              |
| Satt571   | I               | 18.5               | 21                 | 0.944                 | 0.922              |
| Satt239   | I               | 36.94              | 28                 | 0.934                 | 0.938              |
| Sat_268   | I               | 55.1               | 34                 | 0.929                 | 0.879              |
| AW310961  | J               | 5.19               | 22                 | 0.935                 | 0.874              |

|          |   |        |    |       |       |
|----------|---|--------|----|-------|-------|
| Sat_093  | J | 46.09  | 51 | 0.945 | 0.969 |
| Sat_087  | K | 4.85   | 46 | 0.968 | 0.964 |
| Satt240  | K | 52.88  | 16 | 0.911 | 0.856 |
| Satt166  | L | 66.51  | 38 | 0.946 | 0.925 |
| Satt373  | L | 107.24 | 35 | 0.924 | 0.944 |
| Satt540  | M | 35.85  | 47 | 0.934 | 0.957 |
| Satt175  | M | 66.99  | 26 | 0.884 | 0.905 |
| Satt697  | M | 85.35  | 18 | 0.905 | 0.857 |
| BF008905 | O | 28.95  | 10 | 0.985 | 0.784 |
| Satt420  | O | 49.71  | 39 | 0.923 | 0.917 |
| BE801128 | O | 68.97  | 11 | 0.946 | 0.795 |
| Satt447  | O | 82.09  | 28 | 0.95  | 0.816 |
| Satt243  | O | 119.5  | 56 | 0.933 | 0.942 |
| Scaa001  | O | 146.37 | 8  | 0.953 | 0.622 |

<sup>a</sup>: Linkage groups of soybeans;

<sup>b</sup>: number of alleles;

<sup>c</sup>: fixation index;

<sup>d</sup>: expected heterozygosity.

TABLE S3. The four gene loci and primer sequences

| Gene locus      | Forward primer<br>5'–3'       | Reverse primer<br>5'–3'       | Alignment<br>length (bp) |
|-----------------|-------------------------------|-------------------------------|--------------------------|
| <i>BG406170</i> | GCGTTGGAGATTG<br>GAGATAA      | TGGGACAGTAAGC<br>AGTTGACC     | 410                      |
| <i>AF105221</i> | GCGACGCATTCAG<br>TACACACTACAC | GCGGCCAAAGAAA<br>GACAAGTAGATA | 484                      |
| <i>J02746</i>   | GCGGGGTGTTTCGA<br>GGTTTCTAAT  | GCGATGCGTTGGA<br>ATTCAGGATA   | 429                      |
| <i>AJ003246</i> | GCGGGCAAAAAG<br>GAAGAAAT      | GCGGGGAAAAGGT<br>GAAAATTA     | 518                      |

TABLE S4. Summary for parameters ( $K'$ ,  $d$ ,  $Nb$ ) used in the coalescent simulation

| $K'^a$ | $d^b$ | $Nb^c$ | $K'$ | $d$  | $Nb$ | $K'$ | $d$  | $Nb$ |
|--------|-------|--------|------|------|------|------|------|------|
| 0.1    | 100   | 10     | 0.1  | 1000 | 100  | 0.1  | 2000 | 200  |
| 0.5    | 100   | 50     | 0.5  | 1000 | 500  | 0.5  | 2000 | 1000 |
| 1      | 100   | 100    | 1    | 1000 | 1000 | 1    | 2000 | 2000 |
| 1.1    | 100   | 110    | 1.1  | 1000 | 1100 | 1.1  | 2000 | 2200 |
| 1.2    | 100   | 120    | 1.2  | 1000 | 1200 | 1.2  | 2000 | 2400 |
| 1.3    | 100   | 130    | 1.3  | 1000 | 1300 | 1.3  | 2000 | 2600 |
| 1.4    | 100   | 140    | 1.4  | 1000 | 1400 | 1.4  | 2000 | 2800 |
| 1.5    | 100   | 150    | 1.5  | 1000 | 1500 | 1.5  | 2000 | 3000 |
| 1.6    | 100   | 160    | 1.6  | 1000 | 1600 | 1.6  | 2000 | 3200 |
| 1.7    | 100   | 170    | 1.7  | 1000 | 1700 | 1.7  | 2000 | 3400 |
| 1.8    | 100   | 180    | 1.8  | 1000 | 1800 | 1.8  | 2000 | 3600 |
| 1.9    | 100   | 190    | 1.9  | 1000 | 1900 | 1.9  | 2000 | 3800 |
| 2      | 100   | 200    | 2    | 1000 | 2000 | 2    | 2000 | 4000 |
| 2.1    | 100   | 210    | 2.1  | 1000 | 2100 | 2.1  | 2000 | 4200 |
| 2.2    | 100   | 220    | 2.2  | 1000 | 2200 | 2.2  | 2000 | 4400 |
| 2.3    | 100   | 230    | 2.3  | 1000 | 2300 | 2.3  | 2000 | 4600 |
| 2.4    | 100   | 240    | 2.4  | 1000 | 2400 | 2.4  | 2000 | 4800 |
| 2.5    | 100   | 250    | 2.5  | 1000 | 2500 | 2.5  | 2000 | 5000 |
| 2.6    | 100   | 260    | 2.6  | 1000 | 2600 | 2.6  | 2000 | 5200 |
| 2.7    | 100   | 270    | 2.7  | 1000 | 2700 | 2.7  | 2000 | 5400 |
| 2.8    | 100   | 280    | 2.8  | 1000 | 2800 | 2.8  | 2000 | 5600 |
| 2.9    | 100   | 290    | 2.9  | 1000 | 2900 | 2.9  | 2000 | 5800 |
| 3      | 100   | 300    | 3    | 1000 | 3000 | 3    | 2000 | 6000 |
| 3.1    | 100   | 310    | 3.1  | 1000 | 3100 | 3.1  | 2000 | 6200 |
| 3.2    | 100   | 320    | 3.2  | 1000 | 3200 | 3.2  | 2000 | 6400 |
| 3.3    | 100   | 330    | 3.3  | 1000 | 3300 | 3.3  | 2000 | 6600 |
| 3.4    | 100   | 340    | 3.4  | 1000 | 3400 | 3.4  | 2000 | 6800 |
| 3.5    | 100   | 350    | 3.5  | 1000 | 3500 | 3.5  | 2000 | 7000 |
| 3.6    | 100   | 360    | 3.6  | 1000 | 3600 | 3.6  | 2000 | 7200 |
| 3.7    | 100   | 370    | 3.7  | 1000 | 3700 | 3.7  | 2000 | 7400 |
| 3.8    | 100   | 380    | 3.8  | 1000 | 3800 | 3.8  | 2000 | 7600 |
| 3.9    | 100   | 390    | 3.9  | 1000 | 3900 | 3.9  | 2000 | 7800 |
| 4      | 100   | 400    | 4    | 1000 | 4000 | 4    | 2000 | 8000 |
| 4.1    | 100   | 410    | 4.1  | 1000 | 4100 | 4.1  | 2000 | 8200 |
| 4.2    | 100   | 420    | 4.2  | 1000 | 4200 | 4.2  | 2000 | 8400 |
| 4.3    | 100   | 430    | 4.3  | 1000 | 4300 | 4.3  | 2000 | 8600 |
| 4.4    | 100   | 440    | 4.4  | 1000 | 4400 | 4.4  | 2000 | 8800 |
| 4.5    | 100   | 450    | 4.5  | 1000 | 4500 | 4.5  | 2000 | 9000 |
| 4.6    | 100   | 460    | 4.6  | 1000 | 4600 | 4.6  | 2000 | 9200 |
| 4.7    | 100   | 470    | 4.7  | 1000 | 4700 | 4.7  | 2000 | 9400 |
| 4.8    | 100   | 480    | 4.8  | 1000 | 4800 | 4.8  | 2000 | 9600 |
| 4.9    | 100   | 490    | 4.9  | 1000 | 4900 | 4.9  | 2000 | 9800 |

|     |     |      |     |      |       |     |      |       |
|-----|-----|------|-----|------|-------|-----|------|-------|
| 5   | 100 | 500  | 5   | 1000 | 5000  | 5   | 2000 | 10000 |
| 6   | 100 | 600  | 6   | 1000 | 6000  | 6   | 2000 | 12000 |
| 7   | 100 | 700  | 7   | 1000 | 7000  | 7   | 2000 | 14000 |
| 8   | 100 | 800  | 8   | 1000 | 8000  | 8   | 2000 | 16000 |
| 9   | 100 | 900  | 9   | 1000 | 9000  | 9   | 2000 | 18000 |
| 10  | 100 | 1000 | 10  | 1000 | 10000 | 10  | 2000 | 20000 |
| 15  | 100 | 1500 | 15  | 1000 | 15000 | 15  | 2000 | 30000 |
| 20  | 100 | 2000 | 20  | 1000 | 20000 | 20  | 2000 | 40000 |
| 0.1 | 500 | 50   | 0.1 | 1500 | 150   | 0.1 | 3000 | 300   |
| 0.5 | 500 | 250  | 0.5 | 1500 | 750   | 0.5 | 3000 | 1500  |
| 1   | 500 | 500  | 1   | 1500 | 1500  | 1   | 3000 | 3000  |
| 1.1 | 500 | 550  | 1.1 | 1500 | 1650  | 1.1 | 3000 | 3300  |
| 1.2 | 500 | 600  | 1.2 | 1500 | 1800  | 1.2 | 3000 | 3600  |
| 1.3 | 500 | 650  | 1.3 | 1500 | 1950  | 1.3 | 3000 | 3900  |
| 1.4 | 500 | 700  | 1.4 | 1500 | 2100  | 1.4 | 3000 | 4200  |
| 1.5 | 500 | 750  | 1.5 | 1500 | 2250  | 1.5 | 3000 | 4500  |
| 1.6 | 500 | 800  | 1.6 | 1500 | 2400  | 1.6 | 3000 | 4800  |
| 1.7 | 500 | 850  | 1.7 | 1500 | 2550  | 1.7 | 3000 | 5100  |
| 1.8 | 500 | 900  | 1.8 | 1500 | 2700  | 1.8 | 3000 | 5400  |
| 1.9 | 500 | 950  | 1.9 | 1500 | 2850  | 1.9 | 3000 | 5700  |
| 2   | 500 | 1000 | 2   | 1500 | 3000  | 2   | 3000 | 6000  |
| 2.1 | 500 | 1050 | 2.1 | 1500 | 3150  | 2.1 | 3000 | 6300  |
| 2.2 | 500 | 1100 | 2.2 | 1500 | 3300  | 2.2 | 3000 | 6600  |
| 2.3 | 500 | 1150 | 2.3 | 1500 | 3450  | 2.3 | 3000 | 6900  |
| 2.4 | 500 | 1200 | 2.4 | 1500 | 3600  | 2.4 | 3000 | 7200  |
| 2.5 | 500 | 1250 | 2.5 | 1500 | 3750  | 2.5 | 3000 | 7500  |
| 2.6 | 500 | 1300 | 2.6 | 1500 | 3900  | 2.6 | 3000 | 7800  |
| 2.7 | 500 | 1350 | 2.7 | 1500 | 4050  | 2.7 | 3000 | 8100  |
| 2.8 | 500 | 1400 | 2.8 | 1500 | 4200  | 2.8 | 3000 | 8400  |
| 2.9 | 500 | 1450 | 2.9 | 1500 | 4350  | 2.9 | 3000 | 8700  |
| 3   | 500 | 1500 | 3   | 1500 | 4500  | 3   | 3000 | 9000  |
| 3.1 | 500 | 1550 | 3.1 | 1500 | 4650  | 3.1 | 3000 | 9300  |
| 3.2 | 500 | 1600 | 3.2 | 1500 | 4800  | 3.2 | 3000 | 9600  |
| 3.3 | 500 | 1650 | 3.3 | 1500 | 4950  | 3.3 | 3000 | 9900  |
| 3.4 | 500 | 1700 | 3.4 | 1500 | 5100  | 3.4 | 3000 | 10200 |
| 3.5 | 500 | 1750 | 3.5 | 1500 | 5250  | 3.5 | 3000 | 10500 |
| 3.6 | 500 | 1800 | 3.6 | 1500 | 5400  | 3.6 | 3000 | 10800 |
| 3.7 | 500 | 1850 | 3.7 | 1500 | 5550  | 3.7 | 3000 | 11100 |
| 3.8 | 500 | 1900 | 3.8 | 1500 | 5700  | 3.8 | 3000 | 11400 |
| 3.9 | 500 | 1950 | 3.9 | 1500 | 5850  | 3.9 | 3000 | 11700 |
| 4   | 500 | 2000 | 4   | 1500 | 6000  | 4   | 3000 | 12000 |
| 4.1 | 500 | 2050 | 4.1 | 1500 | 6150  | 4.1 | 3000 | 12300 |
| 4.2 | 500 | 2100 | 4.2 | 1500 | 6300  | 4.2 | 3000 | 12600 |
| 4.3 | 500 | 2150 | 4.3 | 1500 | 6450  | 4.3 | 3000 | 12900 |

|     |     |       |     |      |       |     |      |       |
|-----|-----|-------|-----|------|-------|-----|------|-------|
| 4.4 | 500 | 2200  | 4.4 | 1500 | 6600  | 4.4 | 3000 | 13200 |
| 4.5 | 500 | 2250  | 4.5 | 1500 | 6750  | 4.5 | 3000 | 13500 |
| 4.6 | 500 | 2300  | 4.6 | 1500 | 6900  | 4.6 | 3000 | 13800 |
| 4.7 | 500 | 2350  | 4.7 | 1500 | 7050  | 4.7 | 3000 | 14100 |
| 4.8 | 500 | 2400  | 4.8 | 1500 | 7200  | 4.8 | 3000 | 14400 |
| 4.9 | 500 | 2450  | 4.9 | 1500 | 7350  | 4.9 | 3000 | 14700 |
| 5   | 500 | 2500  | 5   | 1500 | 7500  | 5   | 3000 | 15000 |
| 6   | 500 | 3000  | 6   | 1500 | 9000  | 6   | 3000 | 18000 |
| 7   | 500 | 3500  | 7   | 1500 | 10500 | 7   | 3000 | 21000 |
| 8   | 500 | 4000  | 8   | 1500 | 12000 | 8   | 3000 | 24000 |
| 9   | 500 | 4500  | 9   | 1500 | 13500 | 9   | 3000 | 27000 |
| 10  | 500 | 5000  | 10  | 1500 | 15000 | 10  | 3000 | 30000 |
| 15  | 500 | 7500  | 15  | 1500 | 22500 | 15  | 3000 | 45000 |
| 20  | 500 | 10000 | 20  | 1500 | 30000 | 20  | 3000 | 60000 |

---

<sup>a</sup>: Bottleneck severity;

<sup>b</sup>: Duration of domestication;

<sup>c</sup>: Bottleneck population size.

TABLE S5. Genetic diversity statistics for eco-populations of wild (*Glycine soja*) and landrace soybean (*G. max*) inferred from the STRUCTURE2.2 program

| Species        | Eco-region | $N$ | $UH_E$ | $N_R$ |
|----------------|------------|-----|--------|-------|
| <i>G. soja</i> | NEs        | 49  | 0.830  | 4.2   |
|                | NCs        | 73  | 0.780  | 4.0   |
|                | SCs        | 94  | 0.846  | 4.4   |
|                | Ks         | 5   | 0.644  | 2.9   |
|                | Js         | 5   | 0.723  | 3.4   |
|                | Rs         | 5   | 0.710  | 3.2   |
| <i>G. max</i>  | NEm        | 6   | 0.558  | 2.6   |
|                | NCm        | 20  | 0.660  | 3.2   |
|                | SCm        | 34  | 0.673  | 3.3   |
|                | Km         | 5   | 0.610  | 2.8   |
|                | Jm         | 14  | 0.626  | 3.0   |

$N$ : Number of individuals;

$UH_E$ : unbiased expected heterozygosity;

$N_R$ : allelic richness based on the smallest population size.
